# Supplementary material
Source: ML conference proceedings conference paper supplement (https://openaccess.thecvf.com/content/CVPR2023/html/Jiang_Neural_Intrinsic_Embedding_CVPR_2023_paper.html)
Supplement: Supplementary file 1 [file Jiang_Neural_Intrinsic_Embedding_CVPR_2023_supplemental.pdf]

# Neural Intrinsic Embedding for Non-rigid Point Cloud Matching

## Supplementary Materials

Puhua Jiang<sup>1,2</sup> Mingze Sun<sup>1</sup> Ruqi Huang<sup>1</sup>  
<sup>1</sup>Tsinghua Shenzhen International Graduate School  
<sup>2</sup>Peng Cheng Laboratory

{jph21, smz22}@mails.tsinghua.edu.cn ruqihuang@sz.tsinghua.edu.cn

### 1. Implementation Details

**Basis and Descriptor Setting** For a fair comparison to LIE [3], we set the dimension of the output basis of NIE to be 20. Similarly, for the matching network, NIM, we set the dimension of learned features (descriptors) to be 40. Considering NIE as a key component, we conduct an ablation study on the dimension of basis in Table 1. As dim increases, OPT is improved while GeoError is worse, which is probably due to over-fitting. Therefore setting it to be 20 is a good trade-off between the two metrics.

**Down-sampling Scheme on the Modified DGCNN** Recall that in Section 4 of the main submission, we propose a modified version of DGCNN [4], which leverages point

| Dimension | 10  | 20  | 30   |
|-----------|-----|-----|------|
| OPT       | 4.7 | 3.1 | 2.9  |
| Geo. Err  | 7.1 | 9.5 | 11.3 |

Table 1. Ablation study of basis dimension on OPT ( $\times 100$ ), relative geodesic error ( $\times 100$ ).

cloud down-sampling for alleviating sampling density bias. We denote by  $n_s$  the size of the sub-sampled point obtained from furthest point sampling. The empirical test validates that  $n_s = 3000$  achieves a good balance between efficiency and accuracy for all the datasets considered in our paper. In Fig. 1, we provide the detailed network architecture and parameters.

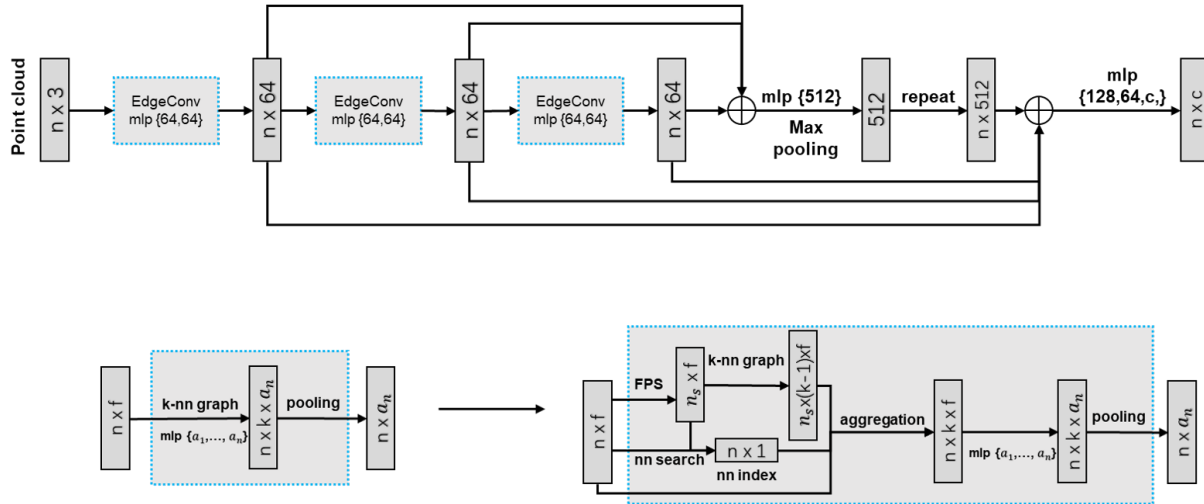

Figure 1. The top row depicts the network architecture of DGCNN [4]. In the bottom row, we specify our modification on top of the EdgeConv blocks. Taking input dimension  $f = 3$  as an example: Given a point cloud  $X$ , we subsample  $X_s$  by FPS sampling. Then we conduct the nearest neighbor search of  $X$  on  $X_s$  and  $k$ -NN search(exclude itself) on  $X_s$ . After that, for a query point  $v_q$  in  $X$ , we find its nearest neighbor  $v_p$  within  $X_s$  and assign the  $k$ -NN of  $v_p$  within  $X_s$  to that of  $v_q$ . Finally, we concatenate the  $k$ -NN of  $v_p$  and  $v_q$  as the aggregation feature to the next procedure.

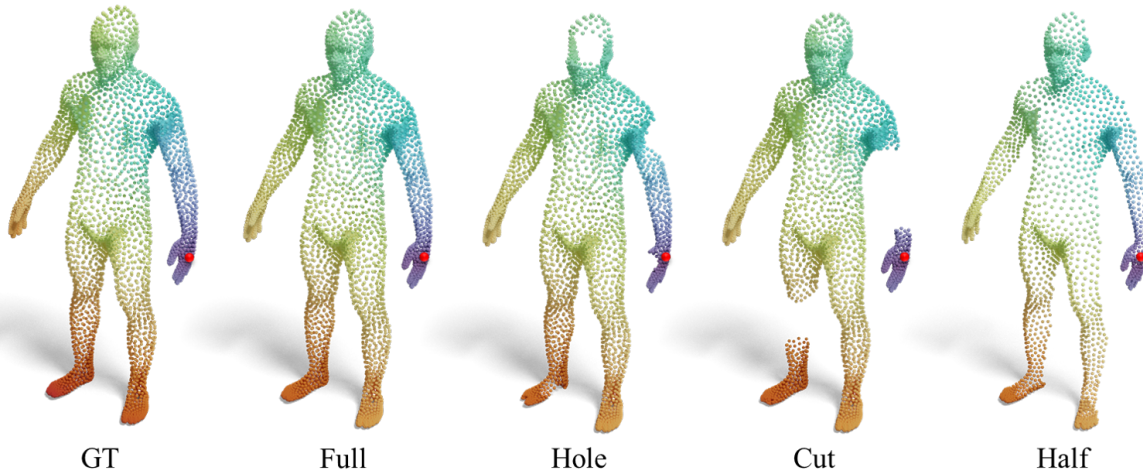

Figure 2. Geodesic distances approximated by NIE on partial point clouds. In each input, we set the source point as the red dot on the left hand, and visualize the geodesic distance from all the other points to it. The color ranges from blue (small distance) to red (large distance).

**Additional details on experiments** For the basis generator network, we train it with a batch size of 3 for 600 epochs. We use a cosine annealing schedule with an Adam optimizer in between a maximum learning rate of 0.002 and a minimum learning rate of 0.0002. During training, we randomly sample 4995 points from each shape. For the descriptor generator network, we use a batch size of 4, again with a cosine annealing schedule with an Adam optimizer in between a maximum learning rate of 0.002, and a minimum learning rate of 0.001. We set  $\lambda_1 = 1$ ,  $\lambda_2 = 1$  and  $\lambda_3 = 0.5$  in Eqn.7 for our experiments. We run a line search of  $\alpha$  in Eqn.11 on the small-scale dataset and fix it to be 30 for *all* experiments.

## 2. Geodesic Approximation for Partial Point Clouds

Unlike the prior approaches on geodesic computation [1, 2] which rely on shape connectivity, our approach can robustly approximate geodesic distances on disconnected shapes (see, e.g., the *hole* and the *cut* in Fig. 2). Table 2 shows that NIE maintains a reasonable geodesic error when partial point clouds (generated with FAUST-r dataset) are given. Fig. 2 shows the qualitative examples of geodesic distance, where the source points are all set in the left hand.

| Method | full | half | hole | cut  |
|--------|------|------|------|------|
| Ours   | 9.5  | 9.8  | 10.  | 13.0 |

Table 2. Relative geodesic errors ( $\times 100$ ) for full and partial point clouds.

## References

- [1] Keenan Crane, Clarisse Weischedel, and Max Wardetzky. The heat method for distance computation. *Commun. ACM*, 60(11):90–99, Oct. 2017. 2
- [2] R. Kimmel and J. Sethian. Fast marching methods on triangulated domains. In *PNAS*, 1998. 2
- [3] Riccardo Marin, Marie-Julie Rakotosaona, Simone Melzi, and Maks Ovsjanikov. Correspondence learning via linearly-invariant embedding. *Advances in Neural Information Processing Systems*, 33:1608–1620, 2020. 1
- [4] Yue Wang, Yongbin Sun, Ziwei Liu, Sanjay E Sarma, Michael M Bronstein, and Justin M Solomon. Dynamic graph cnn for learning on point clouds. *Acm Transactions On Graphics (tog)*, 38(5):1–12, 2019. 1
